# Supplementary material for: α1-antitrypsin mitigates NLRP3-inflammasome activation in amyloid β1–42-stimulated murine astrocytes
Source: Springer Nature journal article supplement (doi:10.1186/s12974-018-1319-x), 2018-09-27
Supplement: MOESM3 [file 16157184]

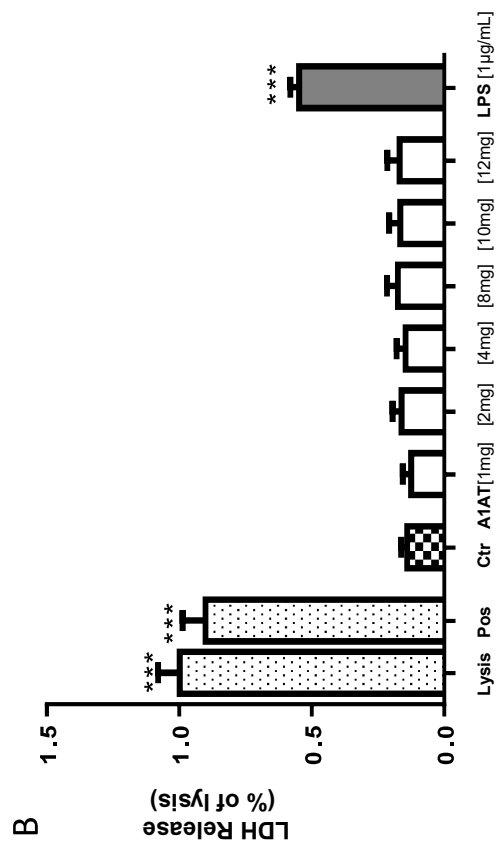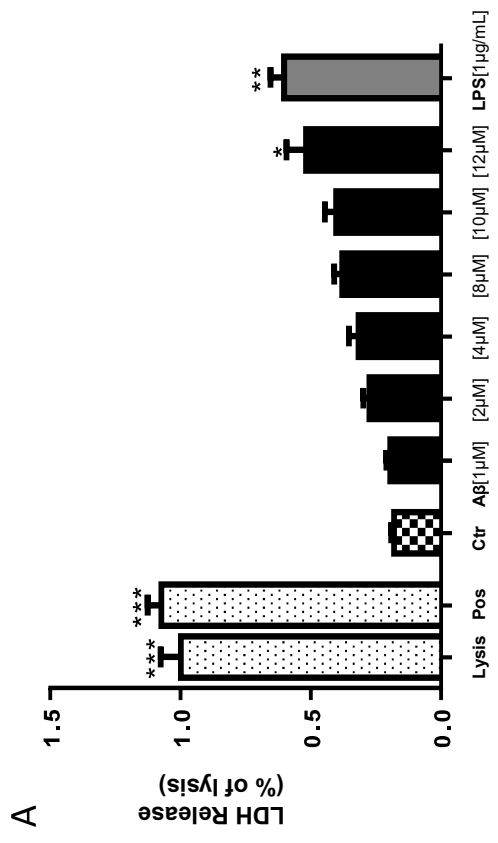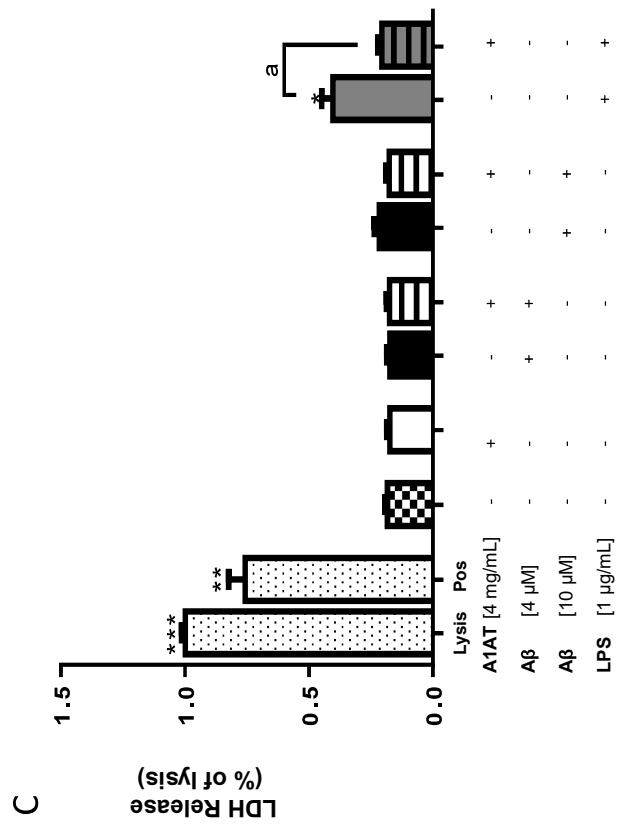

| Lysis Pos      |             |
|----------------|-------------|
| A1AT [4 mg/mL] | - + - + - + |
| Aβ [4 µM]      | - - + + - - |
| Aβ [10 µM]     | - - - + - - |
| LPS [1 µg/mL]  | - - - - + + |
