# Supplementary material for: α1-antitrypsin mitigates NLRP3-inflammasome activation in amyloid β1–42-stimulated murine astrocytes
Source: Springer Nature journal article supplement (doi:10.1186/s12974-018-1319-x), 2018-09-27

A

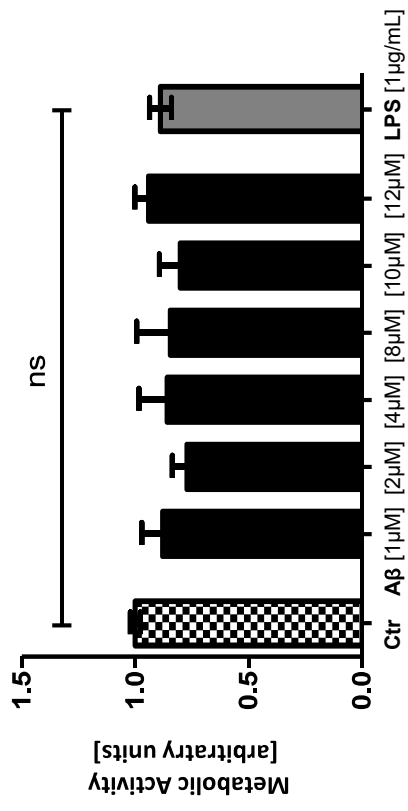

B

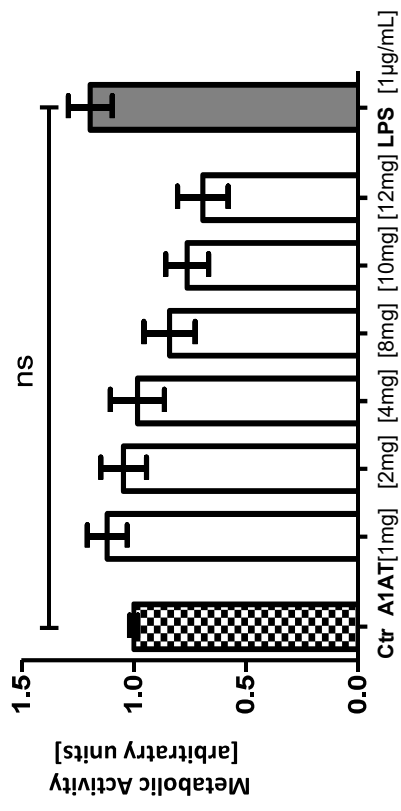

C

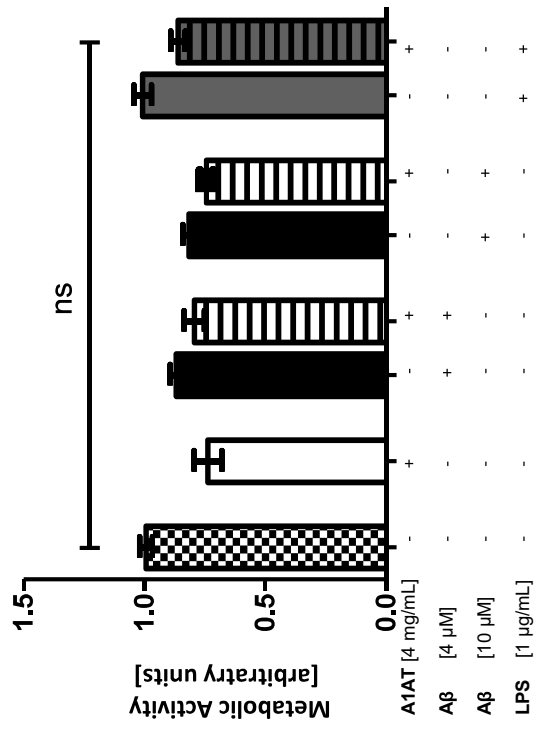

Supplement: MOESM4 [file 16157184]
